# Supplementary material
Source: bioRxiv or medRxiv preprint supplement (https://www.medrxiv.org/highwire/filestream/80022/field_highwire_adjunct_files/6/2020.05.05.20092098-7.pdf)
Supplement: Supplementary file [file 2020.05.05.20092098-7.pdf]

| $R_t$ | $k$               | $\psi$            |
|-------|-------------------|-------------------|
| (0-1] | 0.08 (0-1.09)     | 4.82 (1.11-62.08) |
| (1-2] | 0.38 (0.01-3.46)  | 3.46 (1.11-36.64) |
| (2-3] | 0.69 (0.02-6.35)  | 3.74 (1.11-40.6)  |
| (3-4] | 0.93 (0.03-10.75) | 4.12 (1.11-54.24) |
| (4-5] | 0.95 (0.04-13.59) | 5.16 (1.11-67)    |
| (5-6] | 1.06 (0.05-15.12) | 5.71 (1.11-68.61) |
| (6-7] | 1.26 (0.06-14.94) | 5.57 (1.11-63.55) |
